# Supplementary material
Source: publisher figshare collection journal article supplement (https://gsajournals.figshare.com/ndownloader/files/15456011)
Supplement: Supplementary file 1 [file 15456011]

## Sheet: SnpGenoTable.BMIwDM.march122019
SNP ID	rsID	Reference Allele	N	Minor Allele	Minor Allele Frequency	Genotype 1	Genotype 2	Genotype 3	Mean +/- SD Genotype 1	Mean +/- SD Genotype 2	Mean +/- SD Genotype 3	Association p-value	β	Anova p-value	Phenotype
NC_000001.10.72717742.72717743	rs1776012	A	6594	G	47.74	A/A	A/G	G/G	28.93+/-6.6	28.64+/-6.44	28.02+/-6.02	9.132e-06	-0.4848	0.00022976	BMIwDM
NC_000008.10.11191536.11191537	rs11774673	T	6641	C	48.21	T/T	T/C	C/C	28.11+/-5.97	28.63+/-6.5	29.04+/-6.65	2.142e-06	0.5149	0.000331779	BMIwDM
NC_000008.10.11196969.11196970	rs1435277	C	6632	C	44.39	T/T	T/C	C/C	29.02+/-6.78	28.54+/-6.32	27.98+/-5.94	8.901e-06	-0.4944	7.309e-05	BMIwDM
NC_000008.10.11202153.11202154	rs11250129	G	6631	A	48.12	G/G	G/A	A/A	28.1+/-5.96	28.65+/-6.49	29.02+/-6.69	2.673e-06	0.5115	0.00043903	BMIwDM
NC_000008.10.11213249.11213250	rs2060457	C	6642	T	48.58	C/C	C/T	T/T	28+/-5.94	28.64+/-6.46	29.13+/-6.73	9.298e-08	0.5802	7.37533e-06	BMIwDM
NC_000008.10.11216760.11216761	rs2293859	T	6642	G	48.73	T/T	T/G	G/G	27.99+/-5.94	28.66+/-6.48	29.07+/-6.7	1.371e-07	0.5722	1.02155e-05	BMIwDM
NC_000008.10.11219333.11219334	rs2246606	G	6644	G	42.95	A/A	A/G	G/G	29.06+/-6.85	28.53+/-6.27	27.88+/-5.87	1.366e-06	-0.539	6.88568e-06	BMIwDM
NC_000008.10.11223021.11223022	rs2736280	C	6637	C	48.22	A/A	A/C	C/C	29.16+/-6.84	28.59+/-6.43	27.92+/-5.77	1.362e-06	-0.5308	1.35354e-06	BMIwDM
NC_000008.10.11236974.11236975	rs2572386	A	6643	G	42.27	A/A	A/G	G/G	29.02+/-6.84	28.55+/-6.29	27.88+/-5.8	1.962e-06	-0.5308	2.29011e-05	BMIwDM
NC_000008.10.8106507.8106508	rs2948300	C	6607	T	49.03	C/C	C/T	T/T	27.95+/-5.89	28.67+/-6.46	29.03+/-6.72	4.695e-06	0.5034	8.50666e-06	BMIwDM
NC_000010.10.8127138.8127139	rs12412241	G	6636	A	29.62	G/G	G/A	A/A	28.87+/-6.55	28.34+/-6.28	28.13+/-6.09	3.012e-06	-0.5474	0.00117662	BMIwDM
NC_000011.9.8282785.8282786	rs11041833	G	6637	A	41.01	G/G	G/A	A/A	29.1+/-6.59	28.41+/-6.31	28.08+/-6.23	7.771e-06	-0.4841	1.83803e-06	BMIwDM
NC_000016.9.53799506.53799507	rs9937053	G	6640	A	40.76	G/G	G/A	A/A	28.2+/-6.17	28.64+/-6.42	29.29+/-6.81	6.039e-06	0.5002	2.96142e-05	BMIwDM
NC_000016.9.53799976.53799977	rs9930333	T	6644	G	40.78	T/T	T/G	G/G	28.19+/-6.16	28.66+/-6.42	29.26+/-6.8	6.102e-06	0.4989	3.03367e-05	BMIwDM
NC_000016.9.53800753.53800754	rs9940128	G	6644	A	40.75	G/G	G/A	A/A	28.19+/-6.17	28.65+/-6.42	29.28+/-6.81	4.184e-06	0.5078	2.31361e-05	BMIwDM
NC_000016.9.53800953.53800954	rs1421085	T	6645	C	38.43	T/T	T/C	C/C	28.19+/-6.17	28.67+/-6.41	29.38+/-6.9	5.043e-07	0.5616	6.28603e-06	BMIwDM
NC_000016.9.53803573.53803574	rs1558902	T	6645	A	38.46	T/T	T/A	A/A	28.19+/-6.18	28.67+/-6.41	29.38+/-6.9	4.8e-07	0.5625	6.22616e-06	BMIwDM
NC_000016.9.53809246.53809247	rs1121980	G	6645	A	40.85	G/G	G/A	A/A	28.19+/-6.17	28.64+/-6.41	29.29+/-6.81	4.271e-06	0.5063	2.17518e-05	BMIwDM
NC_000016.9.53813366.53813367	rs17817449	T	6645	G	37.93	T/T	T/G	G/G	28.22+/-6.24	28.66+/-6.37	29.37+/-6.88	2.94e-06	0.5206	1.09351e-05	BMIwDM
NC_000016.9.53813449.53813450	rs8043757	A	6645	T	37.98	A/A	A/T	T/T	28.21+/-6.24	28.67+/-6.37	29.37+/-6.88	2.409e-06	0.525	8.32492e-06	BMIwDM
NC_000016.9.53816274.53816275	rs8050136	C	6645	A	37.94	C/C	C/A	A/A	28.22+/-6.24	28.65+/-6.37	29.4+/-6.89	2.47e-06	0.5244	7.33088e-06	BMIwDM
NC_000016.9.53818459.53818460	rs3751812	G	6644	T	37.52	G/G	G/T	T/T	28.24+/-6.24	28.66+/-6.37	29.35+/-6.9	4.743e-06	0.5119	3.06882e-05	BMIwDM
NC_000016.9.53820526.53820527	rs9939609	T	6645	A	38.06	T/T	T/A	A/A	28.23+/-6.24	28.65+/-6.36	29.38+/-6.89	4.064e-06	0.513	1.41972e-05	BMIwDM
NC_000016.9.53842907.53842908	rs12149832	G	6606	A	39.1	G/G	G/A	A/A	28.26+/-6.28	28.62+/-6.26	29.36+/-7.09	5.984e-06	0.5034	3.93318e-05	BMIwDM
NC_000017.10.1885124.1885125	rs11651343	C	6643	T	8.17	C/C	C/T	T/T	28.44+/-6.29	29.42+/-6.95	28.99+/-7.64	4.75e-06	0.9039	8.1567e-05	BMIwDM
NC_000019.9.48542308.48542309	rs750456	C	6642	C	26.19	T/T	T/C	C/C	28.94+/-6.54	28.17+/-6.29	28.12+/-5.88	7.145e-06	-0.5486	3.12606e-06	BMIwDM
NC_000019.9.48543861.48543862	rs8105198	G	6643	G	17.18	A/A	A/G	G/G	28.82+/-6.51	28.12+/-6.2	27.74+/-5.95	5.137e-06	-0.6466	7.94198e-05	BMIwDM
This table lists the 27 statistically significant SNPs associated with the BMI in our cohort that includes all individuals with DM2. General information about the SNP such as chromosome location, GWAS p-value, power, genotype, cytoband, and ANOVA are listed.
